# Supplementary material for: A water-stable terbium-MOF sensor for the selective, sensitive, and recyclable detection of Al3+ and CO32− ions
Source: Royal Society of Chemistry journal article supplement (doi:10.1039/c9dt03318a), 2019-01-01
Supplement: c9dt03318a1.pdf [file c9dt03318a1.pdf]

Supplementary Information for

## A Water-stable Terbium–MOF Sensor for Selective, Sensitive, and Recyclable Detection of Al<sup>3+</sup> and CO<sub>3</sub><sup>2-</sup> Ions

Zhiying Zhan<sup>†</sup>, Yuejiao Jia<sup>†</sup>, Donghua Li, Xiaolei Zhang, Ming Hu<sup>\*</sup>

(Inner Mongolia Key Laboratory of Chemistry and Physics of Rare Earth Materials;  
School of Chemistry and Chemical Engineering, Inner Mongolia University, Hohhot  
010021, China)

Tel.: +86-471-4992981 .E-mail addresses: [hm988@126.com](mailto:hm988@126.com)

**Table S1.** The selected bond lengths [Å] and angles [°] for **1**.

| Compound <b>1</b>                                                                                       |            |                     |            |
|---------------------------------------------------------------------------------------------------------|------------|---------------------|------------|
| Tb(1)-O(1)                                                                                              | 2.378(5)   | Tb(1)-O(2)#2        | 2.437(5)   |
| Tb(1)-O(9)                                                                                              | 2.383(6)   | Tb(1)-O(4)#3        | 2.453(5)   |
| Tb(1)-O(8)                                                                                              | 2.383(5)   | Tb(1)-O(3)#3        | 2.453(5)   |
| Tb(1)-O(7)#1                                                                                            | 2.422(5)   | Tb(1)-O(1)#2        | 2.613(5)   |
| Tb(1)-O(6)                                                                                              | 2.423(5)   |                     |            |
| O(1)-Tb(1)-O(9)                                                                                         | 85.2(2)    | O(7)#1-Tb(1)-O(4)#3 | 123.32(19) |
| O(1)-Tb(1)-O(8)                                                                                         | 74.50(18)  | O(6)-Tb(1)-O(4)#3   | 72.5(2)    |
| O(9)-Tb(1)-O(8)                                                                                         | 77.8(2)    | O(2)#2-Tb(1)-O(4)#3 | 131.38(19) |
| O(1)-Tb(1)-O(7)#1                                                                                       | 140.64(18) | O(1)-Tb(1)-O(3)#3   | 80.17(18)  |
| O(9)-Tb(1)-O(7)#1                                                                                       | 74.5(2)    | O(9)-Tb(1)-O(3)#3   | 126.13(18) |
| O(8)-Tb(1)-O(7)#1                                                                                       | 68.52(18)  | O(8)-Tb(1)-O(3)#3   | 143.42(18) |
| O(1)-Tb(1)-O(6)                                                                                         | 150.78(18) | O(7)#1-Tb(1)-O(3)#3 | 138.86(18) |
| O(9)-Tb(1)-O(6)                                                                                         | 96.8(2)    | O(6)-Tb(1)-O(3)#3   | 75.16(17)  |
| O(8)-Tb(1)-O(6)                                                                                         | 134.52(18) | O(2)#2-Tb(1)-O(3)#3 | 82.73(17)  |
| O(7)#1-Tb(1)-O(6)                                                                                       | 66.58(17)  | O(4)#3-Tb(1)-O(3)#3 | 53.35(17)  |
| O(1)-Tb(1)-O(2)#2                                                                                       | 115.07(17) | O(1)-Tb(1)-O(1)#2   | 64.4(2)    |
| O(9)-Tb(1)-O(2)#2                                                                                       | 148.54(19) | O(9)-Tb(1)-O(1)#2   | 140.8(2)   |
| O(8)-Tb(1)-O(2)#2                                                                                       | 84.6(2)    | O(8)-Tb(1)-O(1)#2   | 70.85(18)  |
| O(7)#1-Tb(1)-O(2)#2                                                                                     | 74.84(19)  | O(7)#1-Tb(1)-O(1)#2 | 113.37(17) |
| O(6)-Tb(1)-O(2)#2                                                                                       | 77.27(19)  | O(6)-Tb(1)-O(1)#2   | 121.95(19) |
| O(1)-Tb(1)-O(4)#3                                                                                       | 80.28(19)  | O(2)#2-Tb(1)-O(1)#2 | 50.71(17)  |
| O(9)-Tb(1)-O(4)#3                                                                                       | 73.21(19)  | O(4)#3-Tb(1)-O(1)#2 | 121.20(17) |
| O(8)-Tb(1)-O(4)#3                                                                                       | 142.8(2)   | O(3)#3-Tb(1)-O(1)#2 | 74.57(16)  |
| Symmetry transformations used to generate equivalent atoms: #1 -x+3,-y+1,-z #2 -x+2,-y,-z<br>#3 x+1,y,z |            |                     |            |

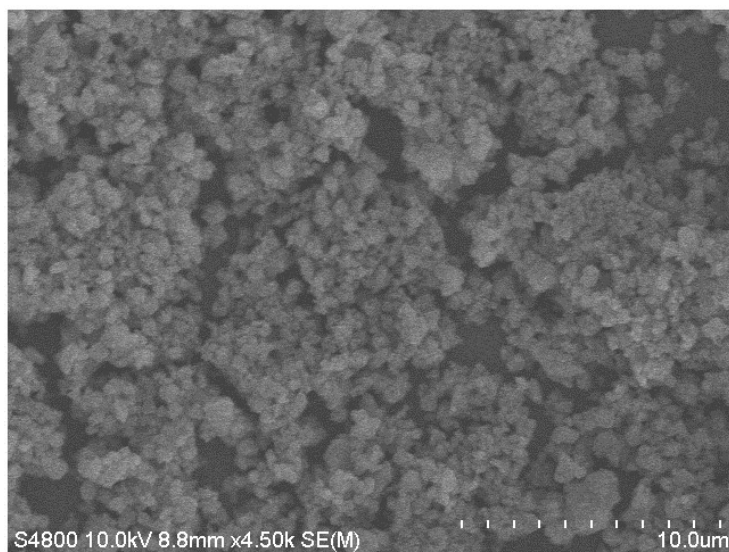

Fig. S1 The SEM image of **1** after grinding.

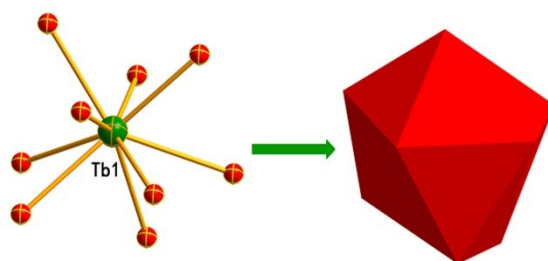

Fig. S2 The monocapped square antiprism coordination geometry of Tb<sup>3+</sup> ion.

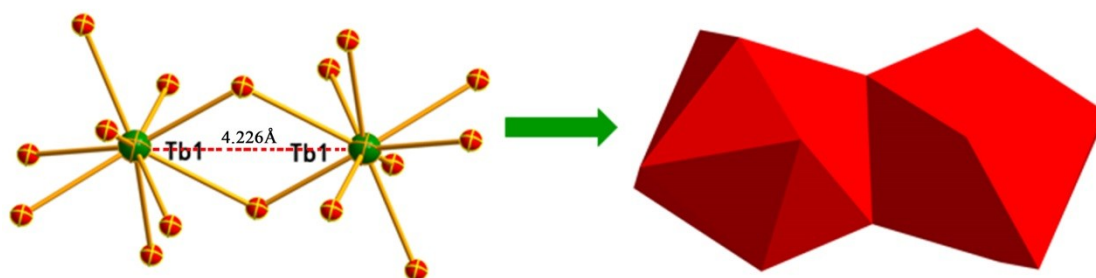

Fig. S3 The binuclear constituted by Tb<sup>3+</sup> ions.

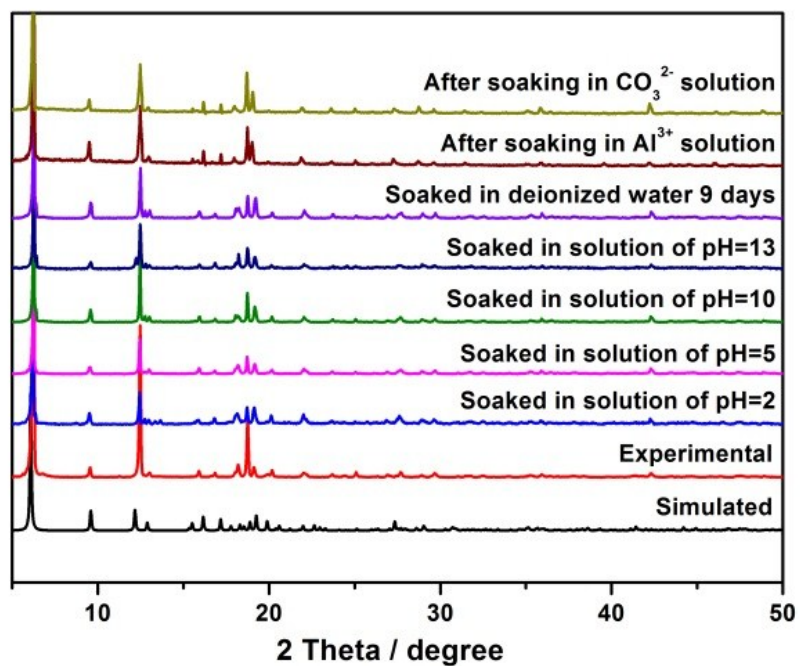

**Fig. S4** PXR D patterns of compound **1** simulated from the X-ray single-crystal structure, as-synthesized samples of compound **1**, compound **1** soaked in various solutions, and power X-ray diffraction patterns of **1** after five recyclable experiments.

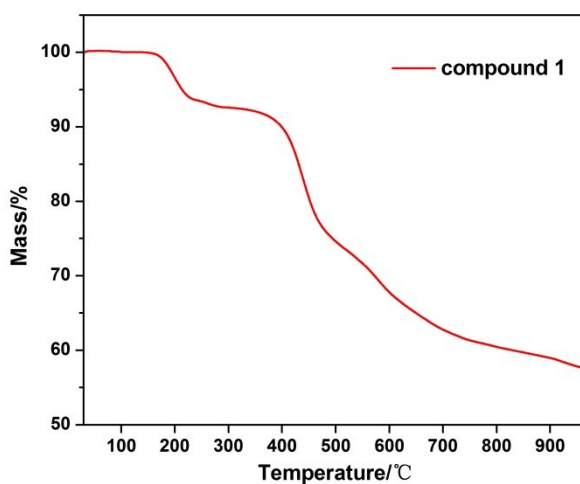

**Fig. S5** View of the TG analysis profile of compound **1**.

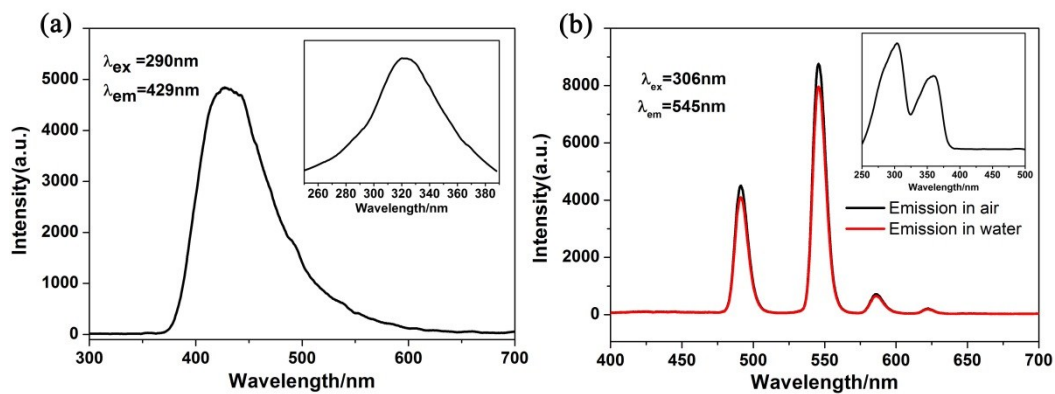

**Fig. S6** (a) The emission spectrum of H<sub>2</sub>ppda ligand. Insets: The excitation spectrum of H<sub>2</sub>ppda ligand; (b) The emission spectra of compound **1** in the solid-state and aqueous suspension, respectively. Insets: The excitation spectrum of compound **1**.

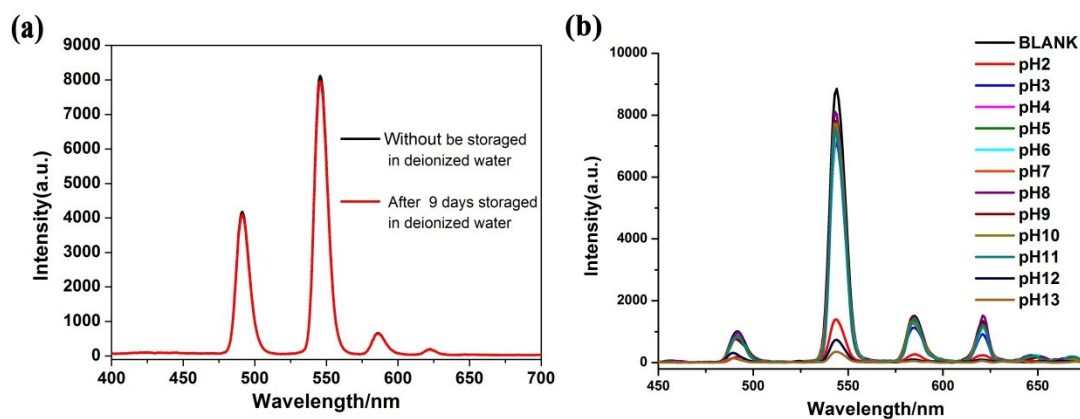

**Fig.S7** (a)The emission spectra of **1** without and after 9 days' storage in deionized water; (b)The emission spectra of **1** immersed in acid/base solutions with pH values varied from 2 to 13.

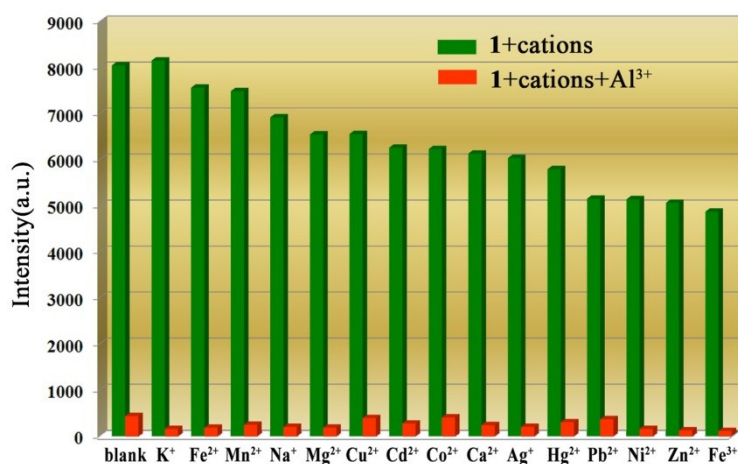

**Fig. S8** The fluorescence intensity for **1** exposed to single cation and mixed cations in aqueous solutions.

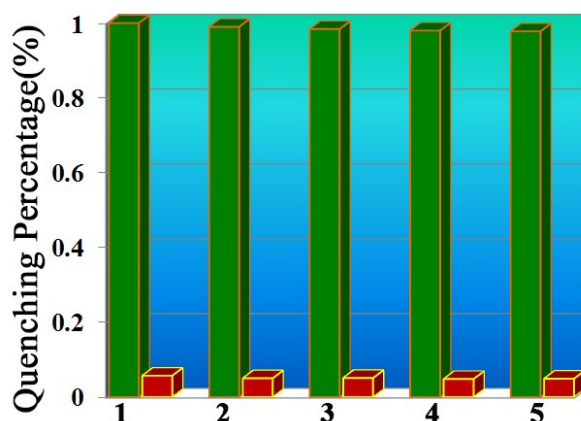

**Fig. S9** Quenching and recovery test of **1** in aqueous solution. The green columns represent the initial relative luminescent intensity and the red columns represent the relative intensity on addition of  $\text{Al}^{3+}$ .

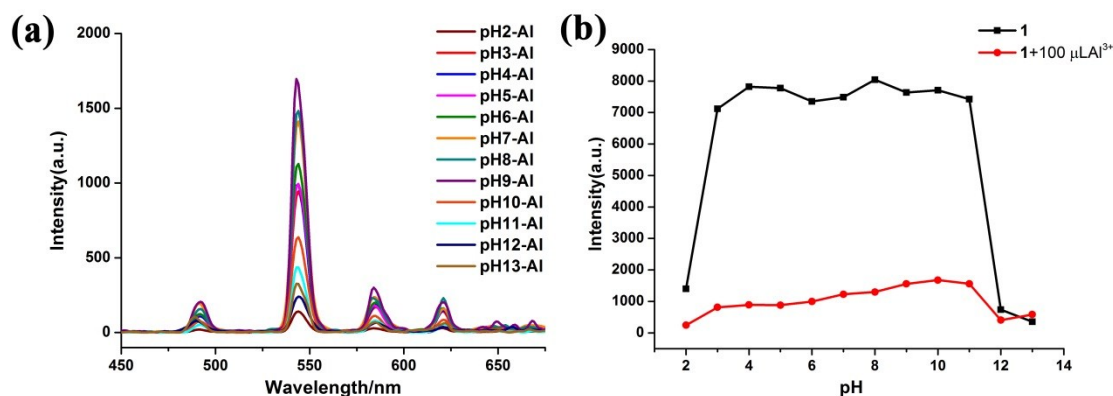

**Fig. S10** (a) PL spectra of **1** dispersed in various aqueous solutions (pH 2-13) in presence of  $100\mu\text{L Al}^{3+}$  ion; (b) Comparison of fluorescence intensity for **1** dispersed in aqueous solutions of pH 2-13 (black line) and in presence of  $100\mu\text{L Al}^{3+}$  ion (red line).

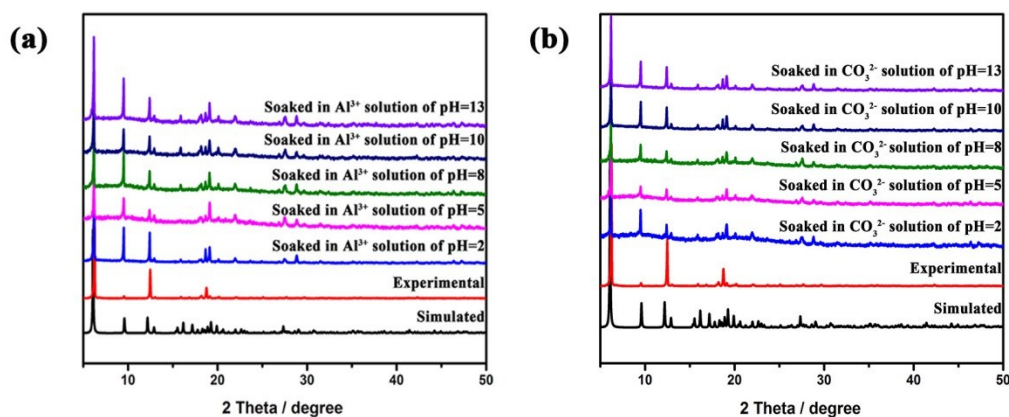

**Fig. S11** PXRD patterns of compound **1** simulated from the X-ray single-crystal structure, as-synthesized samples of compound **1**, compound **1** soaked in  $\text{Al}^{3+}$  (a) and  $\text{CO}_3^{2-}$  (b) solutions of different pH.

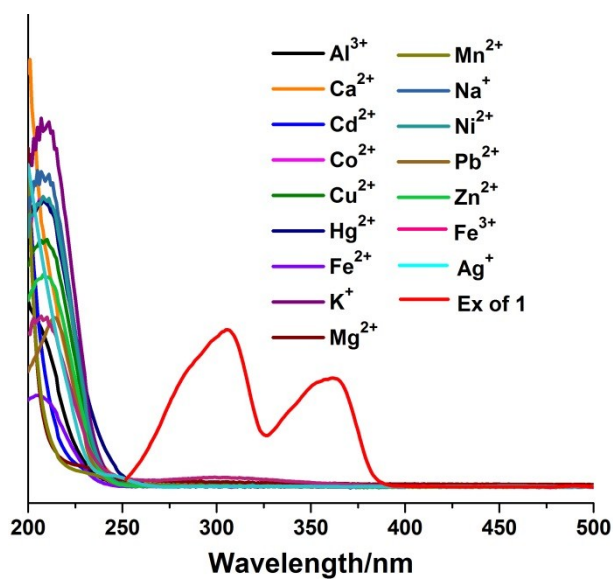

Fig. S12 The UV-Vis adsorption spectra of  $M(\text{NO}_3)_X$  aqueous solutions and the excitation spectrum of **1**.

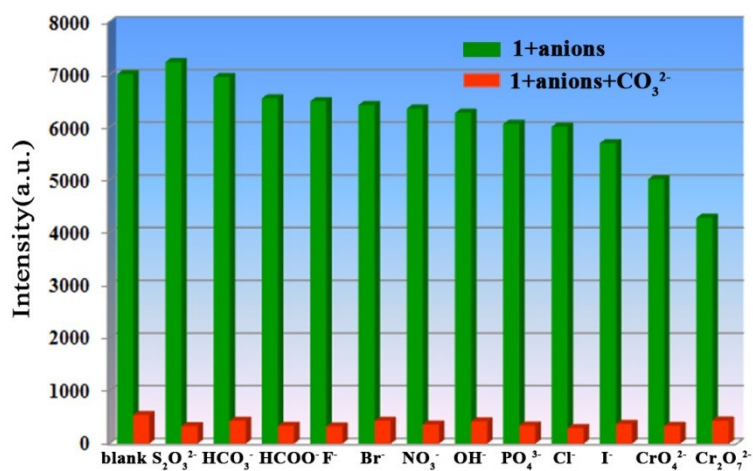

Fig. S13 The fluorescence intensities for **1** exposed to single anion and mixed anions in aqueous solutions.

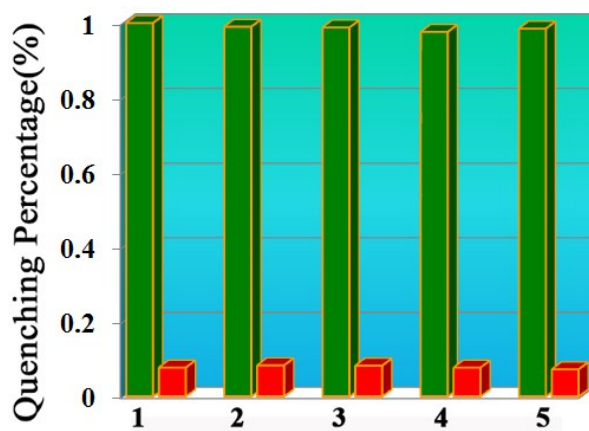

Fig. S14 Quenching and recovery test of **1** in aqueous solution. The green columns represent the initial relative luminescent intensity and the red columns represent the relative intensity on addition of CO<sub>3</sub><sup>2-</sup>.



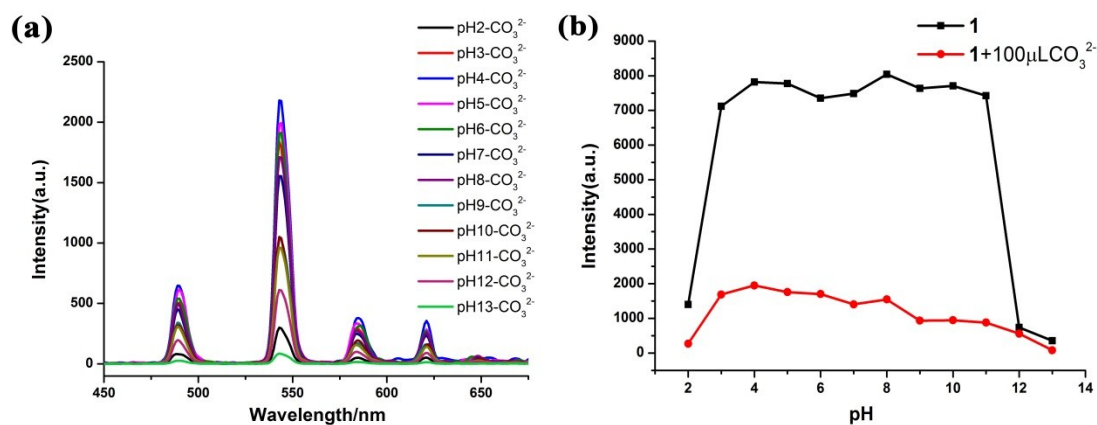

**Fig. S15** (a) PL spectra of **1** dispersed in various aqueous solutions of pH = 2-13 in presence of 100 μL CO<sub>3</sub><sup>2-</sup> ion; (b) Comparison of fluorescence intensity for **1** dispersed in aqueous solutions of pH = 2-13 (black line) and in presence of 100 μL CO<sub>3</sub><sup>2-</sup> ion (red line).

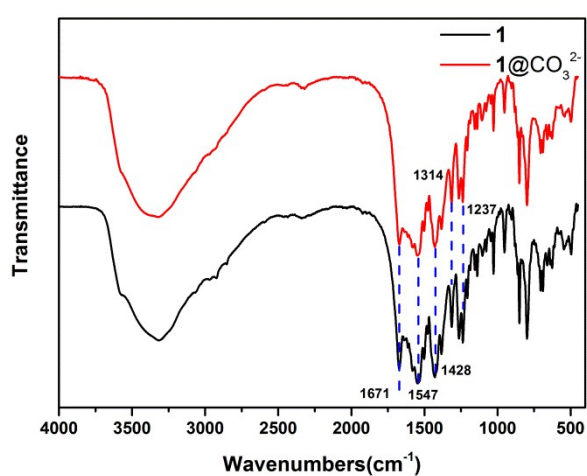

**Fig. S16** FT-IR spectra of **1** after immersed in K<sub>2</sub>CO<sub>3</sub> aqueous solution and the untreated powder.

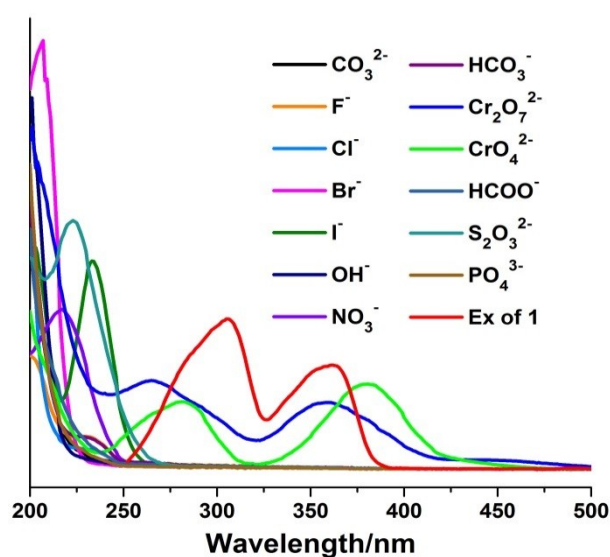

**Fig. S17** The UV-Vis adsorption spectra of K(anion)<sub>x</sub> aqueous solutions and the excitation spectrum of **1**.

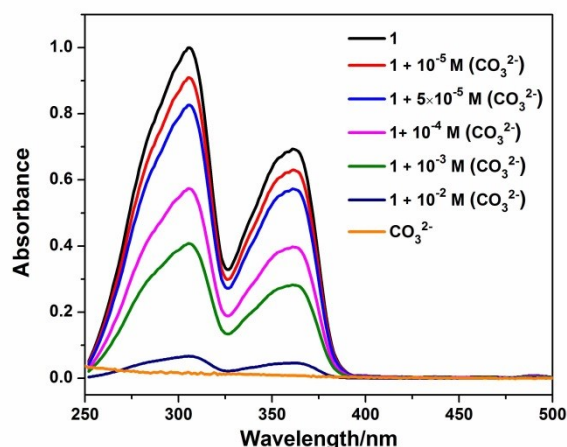

**Fig. S18** The UV-Vis adsorption spectra of **1** after adding various concentrations of  $K_2CO_3$  aqueous solutions.

**Table S2** Comparison of literature reports for MOFs as sensors of  $Al^{3+}$

| MOF                                                                          | $K_{SV}$ ( $M^{-1}$ ) | Detection Limit                      | Medium   | Ref.             |
|------------------------------------------------------------------------------|-----------------------|--------------------------------------|----------|------------------|
| $[Tb(ppda)(ox)_{0.5}(H_2O)_2]_n$ ( <b>1</b> )                                | $5.26 \times 10^3$    | $5.66 \times 10^{-6}$ M<br>(152 ppb) | $H_2O$   | <b>This work</b> |
| $[ \{ Cd_2(syn-dftpmcp)(1,3-BDC)_2 \} \cdot 0.5DMF \cdot H_2O ]_n$           | /                     | 183 ppb                              | $CH_3CN$ | 1                |
| UiO-66-NH <sub>2</sub> -SA                                                   | /                     | 6.98 $\mu$ M                         | $H_2O$   | 2                |
| MOF-LIC-1 (Eu-MOF)                                                           | $3.79 \times 10^4$    | /                                    | DMF      | 3                |
| $[Cd(PAM)(4-bpdb)_{1.5}] \cdot DMF$ (Cd-MOF)                                 | $2.3 \times 10^4$     | $5.6 \times 10^{-7}$ M               | $H_2O$   | 4                |
| $\{ (Me_2NH_2)[Tb(OBA)_2] \cdot (Hatz) \cdot (H_2O)_{1.5} \}_n$ ( <b>1</b> ) | $3.4 \times 10^4$     | /                                    | $H_2O$   | 5                |
| $[Zn_2(HL)_3]^+ @ MOF-5$                                                     | $7.478 \times 10^4$   | /                                    | DMF      | 6                |

**Table S3** Comparison of literature reports for MOFs as sensors of  $CO_3^{2-}$

| MOF                                                                                                | $K_{SV}$ ( $M^{-1}$ ) | Detection Limit                           | Medium                   | Ref.             |
|----------------------------------------------------------------------------------------------------|-----------------------|-------------------------------------------|--------------------------|------------------|
| $[Tb(ppda)(ox)_{0.5}(H_2O)_2]_n$ ( <b>1</b> )                                                      | $1.78 \times 10^3$    | $3.76 \times 10^{-7}$ M<br>(0.38 $\mu$ M) | $H_2O$                   | <b>This work</b> |
| $[Eu](Hhpi)_2(OAc)_6$                                                                              | $9.142 \times 10^3$   | 7.8 $\mu$ M                               | DMSO                     | 7                |
| $\{ [Eu(HL)(H_2O)_3] \cdot H_2O \}_n$ ( <b>1</b> )                                                 | $3.78 \times 10^3$    | $10^{-6}$ M                               | $H_2O$                   | 8                |
| $[ \{ [Eu(HBPTC)(H_2O)_2] \cdot 2DMF \}_n ]$ film                                                  | /                     | $10^{-6}$ M                               | $H_2O$                   | 9                |
| (E)-3-(4-methoxyphenyl)-4-[(4-nitrobenzylidene)-amino]-1H-1,2,4-triazole-5(4H)-thione ( <b>6</b> ) | /                     | 1.91 $\mu$ M                              | EtOH/water<br>(3:7, v/v) | 10               |
| $\{ [Zn_2(\mu_3-OH)(cpta)(4,4'-bipy)] \cdot H_2O \}_n$ ( <b>1</b> )                                | $9.47 \times 10^3$    | $5.55 \times 10^{-6}$ M<br>(5.55 $\mu$ M) | $H_2O$                   | 11               |



## References

1. W. X. Li, J. H. Gu, H. X. Li, M. Dai, D. J. Young, H. Y. Li and J. P. Lang, *Inorg Chem*, 2018, **57**, 13453-13460.
2. S. Y. Zhu and B. Yan, *Dalton Trans*, 2018, **47**, 1674-1681.
3. J.N. Hao and B. Yan, *J. Mater. Chem. C*, 2014, **2**, 6758-6764.
4. W. Chen, Y. Lin, X. Zhang, N. Xu and P. Cheng, *Inorganic Chemistry Communications*, 2017, **79**, 29-32.
5. D. M. Chen, N. N. Zhang, C. S. Liu and M. Du, *Journal of Materials Chemistry C*, 2017, **5**, 2311-2317.
6. M. M. Wu, J. Y. Wang, R. Sun, C. Zhao, J. P. Zhao, G. B. Che and F. C. Liu, *Inorg Chem*, 2017, **56**, 9555-9562.
7. Y. N. Lu, J. L. Peng, X. Zhou, J. Z. Wu, Y. C. Ou and Y. P. Cai, *CrystEngComm*, 2018, **20**, 7574-7581.
8. H. Wang, J. Qin, C. Huang, Y. Han, W. Xu and H. Hou, *Dalton transactions*, 2016, **45**, 12710-12716.
9. H. Liu, H. Wang, T. Chu, M. Yu and Y. Yang, *J. Mater. Chem. C*, 2014, **2**, 8683-8690.
10. M. Saleem, N. G. Choi and K. H. Lee, *International Journal of Environmental Analytical Chemistry*, 2015, **95**, 592-608.
11. A. Ghorai, J. Mondal, R. Chandra and G. K. Patra, *RSC Advances*, 2016, **6**, 72185-72192.
